# Supplementary material
Source: publisher site journal article supplement (https://www.dovepress.com/article/434556)
Supplement: Supplementary file 1 [file get_supplementary_file.php]

**Supplemental online materials**

**Table S1.** Treatments recorded after diagnosis of R/R AML in patients with R/R AML.

| Line of therapy | All patients with R/R AML<br>(N = 289) |                                                                          | <i>FLT3</i> <sup>WT</sup> at R/R diagnosis<br>(N = 58) |                                                                          | <i>FLT3</i> <sup>MUT</sup> at R/R diagnosis<br>(N = 14) |                                                                          | Unknown <i>FLT3</i> mutation status (N = 217) |                                                                          |
|-----------------|----------------------------------------|--------------------------------------------------------------------------|--------------------------------------------------------|--------------------------------------------------------------------------|---------------------------------------------------------|--------------------------------------------------------------------------|-----------------------------------------------|--------------------------------------------------------------------------|
|                 | Patients, <sup>a</sup><br>n (%)        | Mean (SD) Ara-C dose (mg/m <sup>2</sup> ),<br>number of treatment cycles | Patients,<br>n (%)                                     | Mean (SD) Ara-C dose (mg/m <sup>2</sup> ),<br>number of treatment cycles | Patients,<br>n (%)                                      | Mean (SD) Ara-C dose (mg/m <sup>2</sup> ),<br>number of treatment cycles | Patients,<br>n (%)                            | Mean (SD) Ara-C dose (mg/m <sup>2</sup> ),<br>number of treatment cycles |
| <b>Second</b>   | <b>237<br/>(82.0)</b>                  |                                                                          | <b>54 (93.1)</b>                                       |                                                                          | <b>13 (92.9)</b>                                        |                                                                          | <b>170 (78.3)</b>                             |                                                                          |
| MA              | 58 (24.5)                              | 201.8 (581.7), 1.5<br>(0.6)                                              | 17 (31.5)                                              | 105.3 (23.5), 1.5<br>(0.5)                                               | 0                                                       | -                                                                        | 41 (24.1)                                     | 243.5 (693.7), 1.4<br>(0.6)                                              |
| D-AA            | 54 (22.8)                              | 65.5 (30.4), 1.4<br>(0.7)                                                | 14 (25.9)                                              | 45.4 (17.5), 1.2<br>(0.4)                                                | 2 (15.4)                                                | 62.8 (0.0), 1.0<br>(0.0)                                                 | 38 (22.4)                                     | 72.1 (31.5), 1.5<br>(0.8)                                                |

|                   |           |                              |           |                              |          |                              |           |                              |
|-------------------|-----------|------------------------------|-----------|------------------------------|----------|------------------------------|-----------|------------------------------|
| AA                | 40 (16.9) | 95.4 (48.7), 1.4<br>(0.5)    | 17 (31.5) | 101.8 (52.5), 1.3<br>(0.5)   | 1 (7.7)  | 52.1 (-), 1.0 (-)            | 22 (12.9) | 92.6 (46.7), 1.5<br>(0.5)    |
| DA <sup>b</sup>   | 32 (13.5) | 230.4 (433.3), 1.3<br>(0.5)  | 10 (18.5) | 153.6 (53.2), 1.3<br>(0.5)   | 0        | -                            | 22 (12.9) | 264.3 (518.3), 1.2<br>(0.4)  |
| HA                | 29 (12.2) | 115.4 (46.9), 1.4<br>(0.5)   | 9 (16.7)  | 128.3 (29.5), 1.4<br>(0.5)   | 1 (7.7)  | 129.5 (-), 1.0 (-)           | 19 (11.2) | 108.9 (53.2), 1.4<br>(0.5)   |
| Decitabine        | 27 (11.4) | -, 2.1 (1.3)                 | 5 (9.3)   | -, 2.1 (0.8)                 | 1 (7.7)  | -, 1.0 (-)                   | 21 (12.4) | -, 2.2 (1.5)                 |
| FLAG              | 26 (11.0) | 1929.8 (320.3), 1.1<br>(0.4) | 4 (7.4)   | 1993.9 (110.0),<br>1.0 (0.0) | 3 (23.1) | 1686.1 (559.4),<br>1.0 (0.0) | 19 (11.2) | 1952.3 (308.4),<br>1.2 (0.4) |
| IAC               | 23 (9.7)  | 190.6 (362.3), 1.3<br>(0.5)  | 8 (14.8)  | 120.6 (16.3), 1.0<br>(0.0)   | 2 (15.4) | 114.4 (4.8), 1.0<br>(0.0)    | 13 (7.6)  | 232.5 (456.2), 1.5<br>(0.5)  |
| MiDAC             | 20 (8.4)  | 2747.1 (906.9), 2.1<br>(1.0) | 6 (11.1)  | 2306.5 (549.0),<br>2.0 (0.8) | 1 (7.7)  | 1948.5 (393.7),<br>2.0 (-)   | 13 (7.6)  | 2990.9 (957.4),<br>2.1 (1.2) |
| Ara-<br>C+Aza+HHT | 17 (7.2)  | 77.5 (38.7), 1.0<br>(0.0)    | 9 (16.7)  | 90.6 (50.6), 1.0<br>(0.0)    | 3 (23.1) | 63.4 (1.4), 1.0<br>(0.0)     | 5 (2.9)   | 62.5 (7.3), 1.0<br>(0.0)     |

|                    |                  |                              |                  |                               |                 |                    |                  |                              |
|--------------------|------------------|------------------------------|------------------|-------------------------------|-----------------|--------------------|------------------|------------------------------|
| HiDAC              | 13 (5.5)         | 5856.9 (634.2), 2.0<br>(0.7) | 4 (7.4)          | 5549.4 (1117.2),<br>2.6 (0.7) | 0               | -                  | 9 (5.3)          | 5988.7 (213.2),<br>1.7 (0.5) |
| Other <sup>c</sup> | 105<br>(44.3)    | -                            | 25 (46.3)        | -                             | 2 (15.4)        | -                  | 73 (42.9)        | -                            |
| <b>Third</b>       | <b>41 (14.2)</b> |                              | <b>13 (22.4)</b> |                               | <b>2 (14.3)</b> |                    | <b>26 (12.0)</b> |                              |
| D-AA               | 7 (17.1)         | 65.0 (31.9), 1.7<br>(1.0)    | 2 (15.4)         | 61.3 (0.0), 1.0<br>(0.0)      | 1 (50.0)        | 111.3 (-), 1.0 (-) | 4 (15.4)         | 57.9 (30.5), 2.0<br>(1.1)    |
| Decitabine         | 6 (14.6)         | -, 3.8 (2.3)                 | 1 (7.7)          | -, 1.0 (-)                    | 0               | -                  | 5 (19.2)         | -, 4.0 (2.2)                 |
| MA                 | 4 (9.8)          | 101.1 (24.3), 1.0<br>(0.0)   | 0                | -                             | 0               | -                  | 4 (15.4)         | 101.1 (24.3), 1.0<br>(0.0)   |
| Azacitidine        | 4 (9.8)          | -, 1.0 (0.0)                 | 3 (23.1)         | -, 1.0 (0.0)                  | 0               | -                  | 1 (3.8)          | -, 1.0 (-)                   |
| AA                 | 3 (7.3)          | 48.4 (23.6), 1.0<br>(0.0)    | 0                | -                             | 0               | -                  | 3 (11.5)         | 48.4 (23.6), 1.0<br>(0.0)    |
| D-MA               | 3 (7.3)          | 70.1 (31.7), 1.0<br>(0.0)    | 0                | -                             | 1 (50.0)        | 52.1 (-), 1.0 (-)  | 2 (7.7)          | 79.2 (39.0), 1.0<br>(0.0)    |

|                         |                 |                            |                |                            |                |   |                 |                           |
|-------------------------|-----------------|----------------------------|----------------|----------------------------|----------------|---|-----------------|---------------------------|
| HAD                     | 3 (7.3)         | 117.0 (10.0), 1.0<br>(0.0) | 3 (23.1)       | 117.0 (10.0), 1.0<br>(0.0) | 0              | - | 0               | -                         |
| Other <sup>c</sup>      | 26 (63.4)       | -                          | 4 (30.8)       | -                          | 0              | - | 15 (57.7)       | -                         |
| <b>Fourth and above</b> | <b>15 (5.2)</b> |                            | <b>4 (6.9)</b> |                            | <b>1 (7.1)</b> |   | <b>10 (4.6)</b> |                           |
| HA                      | 2 (13.3)        | 53.4 (0.0), 1.7 (0.6)      | 1 (25.0)       | -, 1.0 (-)                 | -              | - | 1 (10.0)        | 53.4 (-), 2.0 (-)         |
| Decitabine              | 2 (13.3)        | -, 1.0 (0.0)               | 0              | -                          | 0              | - | 2 (20.0)        | -, 1.0 (0.0)              |
| IAC                     | 2 (13.3)        | 92.6 (29.0), 1.0<br>(0.0)  | 0              | -                          | 0              | - | 2 (20.0)        | 92.6 (29.0), 1.0<br>(0.0) |
| AA                      | 2 (13.3)        | 78.8 (47.6), 1.7<br>(0.6)  | 1 (25.0)       | 106.3 (-), 2.0 (-)         | 0              | - | 1 (10.0)        | 23.8 (-), 1.0 (-)         |
| Azacitidine             | 2 (13.3)        | -, 1.7 (0.6)               | 1 (25.0)       | -, 1.0 (-)                 | 0              | - | 1 (10.0)        | -, 2.0 (-)                |
| MAE                     | 1 (6.7)         | 32.6 (-), 1.0 (-)          | 0              | -                          | 0              | - | 1 (10.0)        | 32.6 (-), 1.0 (-)         |
| Ara-<br>C+Aza+HHT       | 1 (6.7)         | 53.1 (-), 1.0 (-)          | 1 (25.0)       | 53.1 (-), 1.0 (-)          | 0              | - | 0               | -                         |

|                    |          |                     |          |                     |         |   |          |                     |
|--------------------|----------|---------------------|----------|---------------------|---------|---|----------|---------------------|
| MiDAC              | 1 (6.7)  | 2125.5 (-), 3.0 (-) | 1 (25.0) | 2125.5 (-), 3.0 (-) | 0       | - | 0        | -                   |
| FLAG               | 1 (6.7)  | 1018.2 (-), 1.0 (-) | 0        | -                   | 0       | - | 1 (10.0) | 1018.2 (-), 1.0 (-) |
| HAD                | 1 (6.7)  | 65.8 (-), 1.0 (-)   | 0        | -                   | 0       | - | 1 (10.0) | 65.8 (-), 1.0 (-)   |
| Other <sup>d</sup> | 4 (26.7) | -                   | 1 (25.0) | -                   | 1 (7.1) | - | 2 (20.0) | -                   |

<sup>a</sup>Treatment information was summarized for each regimen and categorized by therapy type. This column summarizes the number of patients who ever received a specific treatment regimen. A patient receiving multiple treatment regimens under one treatment type would be counted for each received treatment regimen; therefore, the percentages under each treatment type may not add up to 100%; <sup>b</sup>DA regimen included DA 7+3, DA 5+2, and other DA. DA 7+3 refers to cytarabine daily for 7 days and daunorubicin daily for 3 days. DA 5+2 refers to cytarabine daily for 5 days and daunorubicin daily for 2 days; <sup>c</sup>Other refers to a combined group of individual regimens used by <5% of patients.

AA, cytarabine and aclarubicin; AML, acute myeloid leukemia; Ara-C, cytarabine; Ara-C+Aza+HHT, cytarabine, azacitidine, and homoharringtonine; DA, daunorubicin and cytarabine; D-AA, decitabine, cytarabine, and aclarubicin; D-MA, decitabine, cytarabine, and mitoxantrone; FLAG, fludarabine, cytarabine, and granulocyte-colony stimulating factor (G-CSF); *FLT3*, FMS-like tyrosine kinase-3, HA, homoharringtonine and cytarabine; HAD, homoharringtonine, cytarabine, and daunorubicin; HiDAC, high-dose cytarabine; IAC, idarubicin, cytarabine, and cyclophosphamide; IQR, interquartile range; MA, cytarabine and mitoxantrone; MAE, mitoxantrone, cytarabine, and etoposide; MiDAC, mid-dose cytarabine; mut, mutated; MUT, mutated; R/R, relapsed or refractory; SD, standard deviation; WT, wild type.
